# Supplementary material for: Development and Optimization of Polymeric Self-Emulsifying Nanocapsules for Localized Drug Delivery: Design of Experiment Approach
Source: Hindawi journal article supplement (doi:10.1155/2014/516069), 2014-01-01

### Supplementary File

**Table 1:** Summary of each factor effect and its p-values for responses Mean globule size (nm) and Encapsulation Efficiency (%)

| Factor                                     | Mean globule size (nm) |         | Encapsulation Efficiency (%) |         |
|--------------------------------------------|------------------------|---------|------------------------------|---------|
|                                            | Factor effect          | p value | Factor effect                | p value |
| Intercept                                  | 176.31                 |         | 71.31                        |         |
| X <sub>1</sub> <sup>@</sup>                | 12.95                  | 0.0031  | 6.01                         | 0.030   |
| X <sub>2</sub> <sup>§</sup>                | -8.39                  | 0.0245  | -11.67                       | 0.0012  |
| X <sub>3</sub> <sup>*</sup>                | 8.01                   | 0.0295  | -4.37                        | 0.088   |
| X <sub>1</sub> X <sub>2</sub> <sup>ε</sup> | 2.64                   | 0.5444  | -6.85                        | 0.0647  |
| X <sub>1</sub> X <sub>3</sub> <sup>ε</sup> | -13.49                 | 0.0141  | 6.88                         | 0.064   |
| X <sub>2</sub> X <sub>3</sub> <sup>ε</sup> | -6.65                  | 0.1537  | -5.71                        | 0.110   |
| X <sub>1</sub> <sup>2α</sup>               | -9.343                 | 0.0545  | 5.74                         | 0.102   |
| X <sub>2</sub> <sup>2α</sup>               | 3.34                   | 0.4370  | -6.91                        | 0.057   |
| X <sub>3</sub> <sup>2α</sup>               | -8.195                 | 0.0828  | -17.44                       | 0.0007  |

<sup>@</sup> Capryol 90 (oil); <sup>§</sup> HPMCAS-HF (polymer); <sup>\*</sup> Aerosil 200 (adsorbent)

<sup>ε</sup> Interaction terms; <sup>α</sup> high order effect

**Figure 1 [A]: Evaluation of the standardized effects of the Capryol<sup>®</sup> 90 (X<sub>1</sub>), HPMCAS-HF (X<sub>2</sub>) and Aerosil<sup>®</sup> 200 (X<sub>3</sub>), and their interactions on mean globule size (Y<sub>1</sub>)**

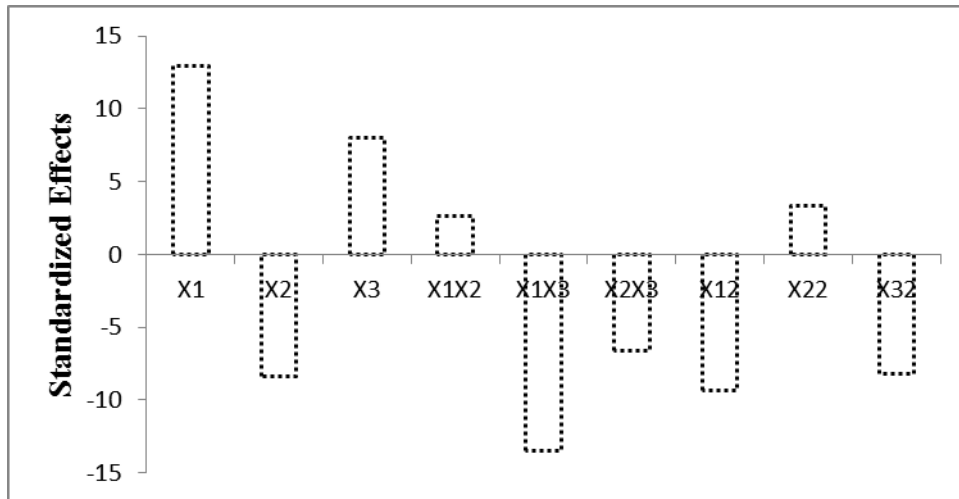

**Figure 1 [B]: Evaluation of the standardized effects of the Capryol<sup>®</sup> 90 (X<sub>1</sub>), HPMCAS-HF (X<sub>2</sub>) and Aerosil<sup>®</sup> 200 (X<sub>3</sub>), and their interactions on encapsulation efficiency (Y<sub>2</sub>)**

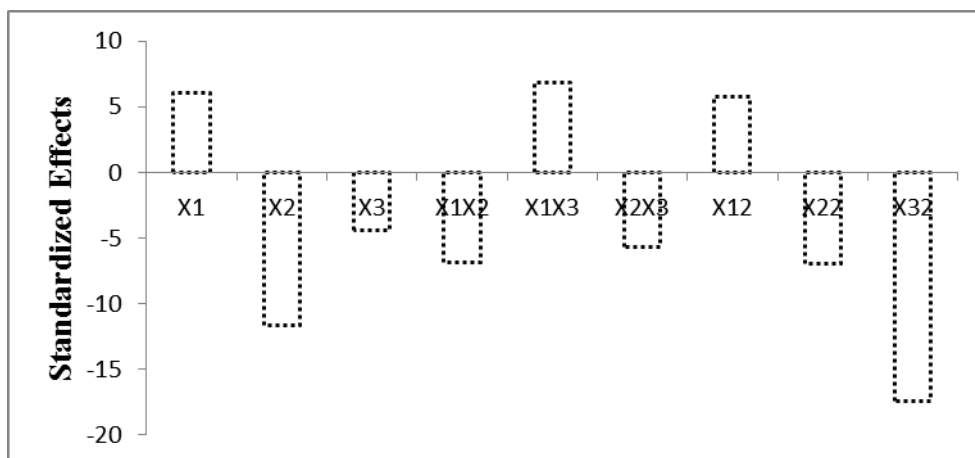

Supplement: f1 [file 516069.f1.pdf]
